# Supplementary material for: Energetics of Paper Wasps (Polistes sp.) from Differing Climates during the Breeding Season
Source: MDPI journal article supplement (doi:10.3390/insects13090800), 2022-09-01
Supplement: s1 [file s1]

# Energetics of paper wasps (*Polistes* sp.) from differing climates during the breeding season.

Helmut Kovac<sup>1\*</sup>, Helmut Käfer<sup>1</sup>, Iacopo Petrocelli<sup>2</sup>, Astrid B. Amstrup<sup>1,3</sup>, Anton Stabentheiner<sup>1\*</sup>

<sup>1</sup> Institute of Biology, University of Graz, 8010 Graz, Austria

<sup>2</sup> Dipartimento di Biologia, Università di Firenze, 50019 Sesto Fiorentino, Italy

<sup>3</sup> Department of Biology - Genetics, Ecology and Evolution, 8000 Aarhus C, Denmark

\* Correspondence: [helmut.kovac@uni-graz.at](mailto:helmut.kovac@uni-graz.at); [anton.stabentheiner@uni-graz.at](mailto:anton.stabentheiner@uni-graz.at)

## Supplementary Information

**Table S1.** Functions and parameters for calculation of the wasps' mixed metabolic rate (MMR) and standard metabolic rate (SMR) according Kovac et al. (2017) and Kovac et al. (2020). In *P. gallicus* the SMR was calculated with a linear function, all other MMR and SMR with exponential functions.  $T_a$  = ambient air temperature.

| Species/Function                        | Parameter | MMR       | SMR       |
|-----------------------------------------|-----------|-----------|-----------|
| <b><i>P. dominula</i></b>               |           |           |           |
| $y = y_0 + A \cdot \exp(R_0 \cdot T_a)$ | $y_0$     | -65.626   | -3.10356  |
|                                         | $A$       | 46.443    | 15.36177  |
|                                         | $R_0$     | 0.08296   | 0.10942   |
| <b><i>P. gallicus</i></b>               |           |           |           |
| $y = y_0 + A \cdot \exp(R_0 \cdot T_a)$ | $y_0$     | 104.58839 | -50.69017 |
| $Y = y_0 + A \cdot T_a$                 | $A$       | 3.19731   | 15.39015  |
|                                         | $R_0$     | 0.14276   |           |
| <b><i>P. biglumis</i></b>               |           |           |           |
| $y = y_0 + A \cdot \exp(R_0 \cdot T_a)$ | $y_0$     | -149.2341 | -65.42187 |
|                                         | $A$       | 181.74669 | 46.57254  |
|                                         | $R_0$     | 0.03462   | 0.06316   |

**Table S2.** Functions and parameters for calculations of the wasps' body temperature according Kovac et al. (2017) and Stabentheiner et al. (2022).  $T_a$  = ambient air temperature.

| Species / Function                                                          | Parameter | Value      |
|-----------------------------------------------------------------------------|-----------|------------|
| <b><i>P. dominula</i></b>                                                   |           |            |
| $T_{body} = a \cdot (1 + (d-1) \cdot \exp(-k \cdot (T_a - x_c)))^{1/(1-d)}$ | $a$       | 39.36392   |
|                                                                             | $x_c$     | 30.11685   |
|                                                                             | $d$       | 10.67527   |
|                                                                             | $k$       | 0.36288    |
| <b><i>P. gallicus</i></b>                                                   |           |            |
| $T_{body} = a + x_c \cdot T_a + d \cdot \text{Radiation}$                   | $a$       | 4.49252    |
|                                                                             | $x_c$     | 0.893964   |
|                                                                             | $d$       | 0.00337853 |
| <b><i>P. biglumis</i></b>                                                   |           |            |
| $T_{body} = a + x_c \cdot T_a + d \cdot \text{Radiation}$                   | $a$       | 0.540869   |
|                                                                             | $x_c$     | 1.0583     |
|                                                                             | $d$       | 0.00652941 |
